# Supplementary material
Source: Springer Nature journal article supplement (https://www.springermedizin.de/resource/supplementary/12985_2006_145_MOESM3_ESM.pdf/9607380)

A.

| Virus | vORF1 |   |    |   | wt |   |
|-------|-------|---|----|---|----|---|
|       | 48    |   | 60 |   | 60 |   |
| E-64d | -     | + | -  | + | -  | + |

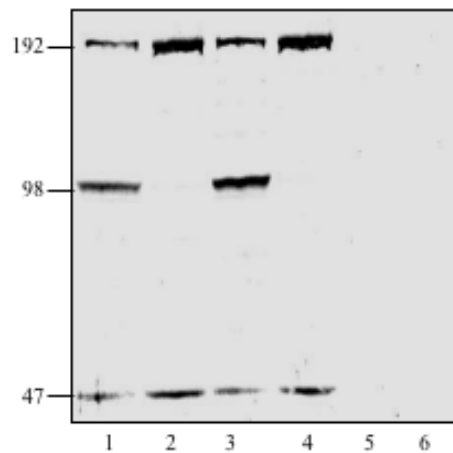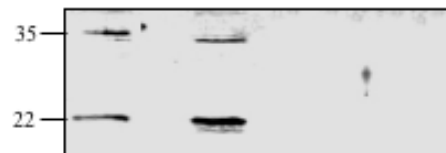

B.

| Virus | vORF1 |   |    |   | wt |   |
|-------|-------|---|----|---|----|---|
|       | 48    |   | 60 |   | 60 |   |
| E-64d | -     | + | -  | + | -  | + |

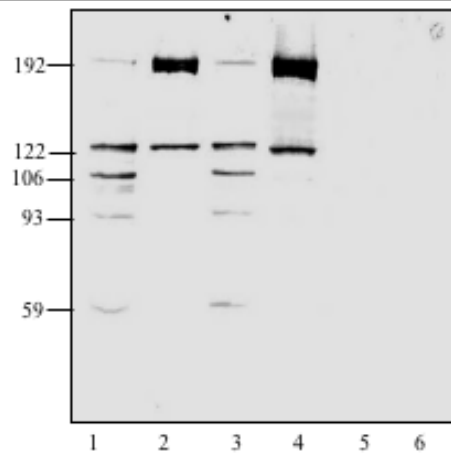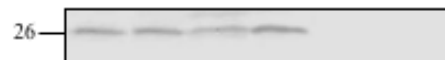

Supplement: MOESM3 [file 9607380]
